# Supplementary material for: The CO–Ne van der Waals complex: ab initio intermolecular potential energy, interaction induced electric dipole moment and polarizability surfaces, and second virial coefficients
Source: Royal Society of Chemistry journal article supplement (doi:10.1039/b905806k), 2009-01-01
Supplement: b905806k.pdf [file b905806k.pdf]

# The Supporting Information

## The CO–Ne van der Waals complex: *ab initio* intermolecular potential energy, interaction induced electric dipole moment and polarizability surfaces, and second virial coefficients

Angelika Baranowska, Berta Fernández

*Department of Physical Chemistry, Faculty of Chemistry,*

*University of Santiago de Compostela,*

*E-15782 Santiago de Compostela, Spain*

Antonio Rizzo

*Istituto per i Processi Chimico-Fisici del Consiglio Nazionale delle Ricerche,*

*Area della Ricerca, via G. Moruzzi 1,*

*loc. S. Cataldo, I-56124 Pisa, Italy*

Branislav Jansik

*Teoretisk Kemi, Kemisk Institut,*

*Aarhus Universitet,*

*Langelandsgade 140,*

*8000 Aarhus C, Denmark*

TABLE I: CO–Ne interaction dipole moment basis set convergence study.  $R$  values in Å,  $\theta$  in  $^\circ$ , and interaction dipole moment values in au.

|       | $\Delta\mu_{x'} \times 10^3$ |                     | $\Delta\mu_{z'} \times 10^3$ |                     |
|-------|------------------------------|---------------------|------------------------------|---------------------|
|       | aug-cc-pVXZ-33211            | d-aug-cc-pVXZ-33211 | aug-cc-pVXZ-3 3211           | d-aug-cc-pVXZ-33211 |
|       | $R=3.355, \theta=92.2$       |                     |                              |                     |
| $X=T$ | 0.7356                       | 0.7463              | 5.3578                       | 5.4894              |
| $X=Q$ | 0.7852                       | 0.7963              | 5.4661                       | 5.5112              |
|       | $R=3.000, \theta=92.2$       |                     |                              |                     |
| $X=T$ | 1.4686                       | 1.4816              | 11.8006                      | 11.9358             |
| $X=Q$ | 1.5206                       | 1.5382              | 11.8386                      | 11.8847             |
|       | $R=6.000, \theta=92.2$       |                     |                              |                     |
| $X=T$ | -0.0089                      | -0.0118             | 0.3296                       | 0.3319              |
| $X=Q$ | -0.0023                      | -0.0026             | 0.3234                       | 0.3265              |

TABLE II: CO–Ne static electric dipole polarizability and Cauchy moment basis set selection  $R$  values in Å,  $\theta$  in  $^\circ$ , and the static electric dipole polarizability and Cauchy moment values in au.

|       | $\Delta\alpha_{ave}(R, \theta) \times 10^2$ |                     | $\Delta S(-4)_{ave}(R, \theta) \times 10^2$ |                     |
|-------|---------------------------------------------|---------------------|---------------------------------------------|---------------------|
|       | aug-cc-pVXZ-33211                           | d-aug-cc-pVXZ-33211 | aug-cc-pVXZ-33211                           | d-aug-cc-pVXZ-33211 |
|       | $R=3.355, \theta=92.2$                      |                     |                                             |                     |
| $X=T$ | -3.932                                      | -4.322              | -28.713                                     | -31.450             |
| $X=Q$ | -4.093                                      | -4.169              | -29.033                                     | -29.933             |
|       | $R=3.000, \theta=92.2$                      |                     |                                             |                     |
| $X=T$ | -8.681                                      | -9.103              | -60.823                                     | -63.797             |
| $X=Q$ | -8.777                                      | -8.841              | -60.439                                     | -61.311             |
|       | $R=6.000, \theta=92.2$                      |                     |                                             |                     |
| $X=T$ | -0.248                                      | -0.345              | 0.590                                       | -0.083              |
| $X=Q$ | -0.319                                      | -0.349              | 0.200                                       | -0.103              |

TABLE III: CO–Ne interaction induced energies evaluated with the CCSD(T) method and the d-aug-cc-pVTZ-33211 basis set.  $R$  values in Å,  $\theta$  in  $^\circ$ , and energy values in  $\text{cm}^{-1}$ . See the text for details.

| R [Å] | $\theta$ [ $^\circ$ ] |           |          |          |          |          |          |           |           |           |
|-------|-----------------------|-----------|----------|----------|----------|----------|----------|-----------|-----------|-----------|
|       | 0.0                   | 20.0      | 40.0     | 60.0     | 80.0     | 100.0    | 120.0    | 140.0     | 160.0     | 180.0     |
| 2.20  | 16310.670             | 13632.070 | 8562.292 | 4848.532 | 3216.475 | 3431.050 | 6464.548 | 15138.227 | 30415.861 | 40265.513 |
| 2.30  | 10596.381             | 8870.258  | 5567.400 | 3131.142 | 2073.783 | 2283.404 | 4542.406 | 10978.372 | 22099.189 | 29018.710 |
| 2.50  | 4369.925              | 3655.624  | 2270.940 | 1243.529 | 810.645  | 959.730  | 2159.249 | 5559.085  | 11248.976 | 14624.553 |
| 2.75  | 1346.903              | 1114.329  | 661.459  | 328.135  | 194.609  | 269.411  | 776.207  | 2220.090  | 4579.481  | 5932.341  |
| 3.00  | 348.729               | 276.360   | 137.092  | 37.888   | 1.203    | 32.038   | 229.210  | 808.003   | 1749.471  | 2279.964  |
| 3.15  | 122.679               | 88.213    | 23.198   | -21.054  | -36.184  | -20.032  | 86.138   | 410.255   | 941.882   | 1240.453  |
| 3.25  | 43.563                | 23.152    | -14.452  | -38.686  | -46.306  | -36.579  | 31.464   | 248.014   | 607.421   | 809.462   |
| 3.40  | -16.771               | -25.371   | -40.165  | -48.095  | -49.929  | -46.305  | -13.955  | 100.331   | 296.023   | 406.785   |
| 3.50  | -34.626               | -39.000   | -45.776  | -48.181  | -48.217  | -47.011  | -28.925  | 43.342    | 171.446   | 244.630   |
| 3.60  | -42.589               | -44.423   | -46.487  | -45.791  | -44.919  | -45.249  | -36.462  | 7.479     | 89.639    | 137.277   |
| 3.75  | -44.448               | -44.315   | -42.890  | -40.116  | -38.767  | -40.330  | -39.472  | -21.172   | 18.679    | 42.691    |
| 3.85  | -42.282               | -41.538   | -39.128  | -35.910  | -34.538  | -36.476  | -38.382  | -29.916   | -6.804    | 7.763     |
| 4.00  | -37.006               | -35.890   | -33.026  | -29.823  | -28.594  | -30.709  | -34.609  | -34.397   | -26.080   | -20.006   |
| 4.10  | -33.062               | -31.909   | -29.110  | -26.142  | -25.053  | -27.133  | -31.507  | -34.089   | -31.292   | -28.466   |
| 4.25  | -27.323               | -26.278   | -23.825  | -21.333  | -20.457  | -22.363  | -26.768  | -31.246   | -32.910   | -32.793   |
| 4.35  | -23.841               | -22.923   | -20.766  | -18.604  | -17.856  | -19.607  | -23.788  | -28.636   | -31.692   | -32.468   |
| 4.50  | -19.296               | -18.586   | -16.870  | -15.161  | -14.576  | -16.078  | -19.770  | -24.501   | -28.315   | -29.639   |
| 5.00  | -9.666                | -9.354    | -8.599   | -7.830   | -7.589   | -8.399   | -10.428  | -13.319   | -16.047   | -17.111   |
| 6.00  | -2.858                | -2.765    | -2.577   | -2.410   | -2.391   | -2.620   | -3.125   | -3.806    | -4.431    | -4.694    |
| 7.00  | -1.041                | -1.017    | -0.963   | -0.915   | -0.912   | -0.987   | -1.139   | -1.334    | -1.501    | -1.567    |
| 10.00 | -0.113                | -0.112    | -0.107   | -0.103   | -0.102   | -0.108   | -0.119   | -0.134    | -0.145    | -0.150    |
| 15.00 | -0.010                | -0.010    | -0.009   | -0.009   | -0.009   | -0.009   | -0.010   | -0.011    | -0.011    | -0.012    |
| 20.00 | -0.002                | -0.002    | -0.002   | -0.002   | -0.002   | -0.002   | -0.002   | -0.002    | -0.002    | -0.002    |

TABLE IV: CO–Ne interaction induced dipole moment  $x'$ -components evaluated with the CCSD method and the d-aug-cc-pVTZ-33211 basis set.  $R$  values in Å,  $\theta$  in  $^\circ$ , and dipole moment values in au. See the text for details.

| R [Å] | $\Delta\mu_{x'} \times 10^3$ |         |         |         |         |         |          |           |           |           |
|-------|------------------------------|---------|---------|---------|---------|---------|----------|-----------|-----------|-----------|
|       | $\theta [^\circ]$            |         |         |         |         |         |          |           |           |           |
|       | 0.0                          | 20.0    | 40.0    | 60.0    | 80.0    | 100.0   | 120.0    | 140.0     | 160.0     | 180.0     |
| 2.20  | 76.2747                      | 86.0037 | 80.4026 | 52.0204 | 24.1674 | -9.1132 | -82.2045 | -224.4778 | -383.6192 | -438.3663 |
| 2.30  | 54.2913                      | 60.9372 | 58.2968 | 39.4547 | 19.3860 | -7.0190 | -65.9174 | -178.1162 | -302.8602 | -349.9192 |
| 2.50  | 26.1321                      | 29.9714 | 30.7074 | 22.9491 | 12.5490 | -4.3229 | -42.4944 | -111.5896 | -186.3854 | -216.5582 |
| 2.75  | 8.5632                       | 11.0759 | 13.5003 | 11.8729 | 7.3947  | -2.5078 | -24.5739 | -61.2292  | -98.6981  | -113.9273 |
| 3.00  | 0.9812                       | 2.8524  | 5.6368  | 6.3293  | 4.4788  | -1.5500 | -14.2530 | -32.7316  | -49.5985  | -56.0839  |
| 3.15  | -1.1126                      | 0.4913  | 3.2018  | 4.4409  | 3.3783  | -1.2002 | -10.3331 | -22.1474  | -31.5882  | -34.8612  |
| 3.25  | -1.9162                      | -0.4627 | 2.1388  | 3.5522  | 2.8257  | -1.0273 | -8.3732  | -16.9567  | -22.8621  | -24.6019  |
| 3.40  | -2.5496                      | -1.2918 | 1.0990  | 2.6003  | 2.1943  | -0.8323 | -6.1624  | -11.2431  | -13.4165  | -13.5501  |
| 3.50  | -2.7176                      | -1.5743 | 0.6609  | 2.1481  | 1.8731  | -0.7342 | -5.0616  | -8.4896   | -8.9714   | -8.3906   |
| 3.60  | -2.7547                      | -1.7151 | 0.3615  | 1.7997  | 1.6119  | -0.6550 | -4.1884  | -6.3748   | -5.6430   | -4.5634   |
| 3.75  | -2.6577                      | -1.7559 | 0.0884  | 1.4169  | 1.3055  | -0.5622 | -3.2031  | -4.1059   | -2.2213   | -0.6956   |
| 3.85  | -2.5346                      | -1.7139 | -0.0158 | 1.2284  | 1.1445  | -0.5133 | -2.7097  | -3.0422   | -0.7149   | 0.9615    |
| 4.00  | -2.3105                      | -1.5968 | -0.1003 | 1.0137  | 0.9507  | -0.4536 | -2.1464  | -1.9223   | 0.7357    | 2.4896    |
| 4.10  | -2.1519                      | -1.5005 | -0.1261 | 0.9035  | 0.8461  | -0.4207 | -1.8594  | -1.4073   | 1.3165    | 3.0545    |
| 4.25  | -1.9167                      | -1.3475 | -0.1377 | 0.7726  | 0.7170  | -0.3789 | -1.5246  | -0.8745   | 1.8016    | 3.4538    |
| 4.35  | -1.7671                      | -1.2460 | -0.1346 | 0.7024  | 0.6457  | -0.3549 | -1.3497  | -0.6339   | 1.9485    | 3.5187    |
| 4.50  | -1.5582                      | -1.1008 | -0.1214 | 0.6158  | 0.5560  | -0.3235 | -1.1404  | -0.3895   | 2.0021    | 3.4317    |
| 5.00  | -1.0152                      | -0.7125 | -0.0596 | 0.4245  | 0.3549  | -0.2444 | -0.7163  | -0.0843   | 1.5907    | 2.5566    |
| 6.00  | -0.4597                      | -0.3119 | 0.0058  | 0.2293  | 0.1648  | -0.1465 | -0.3535  | -0.0267   | 0.7412    | 1.1679    |
| 7.00  | -0.2431                      | -0.1618 | 0.0119  | 0.1292  | 0.0832  | -0.0908 | -0.1930  | -0.0119   | 0.3802    | 0.5922    |
| 10.00 | -0.0557                      | -0.0356 | 0.0066  | 0.0322  | 0.0157  | -0.0277 | -0.0463  | 0.0015    | 0.0897    | 0.1351    |
| 15.00 | -0.0094                      | -0.0055 | 0.0024  | 0.0064  | 0.0019  | -0.0069 | -0.0093  | 0.0014    | 0.0187    | 0.0272    |
| 20.00 | -0.0024                      | -0.0012 | 0.0011  | 0.0020  | 0.0002  | -0.0026 | -0.0030  | 0.0008    | 0.0064    | 0.0091    |

TABLE V: CO–Ne interaction induced dipole moment  $z'$ -components evaluated with the CCSD method and the d-aug-cc-pVTZ-33211 basis set.  $R$  values in Å,  $\theta$  in  $^\circ$ , and dipole moment values in au. See the text for details.

| R [Å] | $\Delta\mu_{z'} \times 10^3$ |         |         |         |         |          |          |          |          |        |
|-------|------------------------------|---------|---------|---------|---------|----------|----------|----------|----------|--------|
|       | $\theta [^\circ]$            |         |         |         |         |          |          |          |          |        |
|       | 0.0                          | 20.0    | 40.0    | 60.0    | 80.0    | 100.0    | 120.0    | 140.0    | 160.0    | 180.0  |
| 2.20  | 0.0000                       | 13.8170 | 31.4129 | 38.3048 | 51.1240 | 101.8488 | 207.7941 | 329.8573 | 313.7426 | 0.0000 |
| 2.30  | 0.0000                       | 8.2895  | 21.1519 | 28.4136 | 40.5000 | 80.3836  | 159.9171 | 246.2609 | 223.9393 | 0.0000 |
| 2.50  | 0.0000                       | 2.1096  | 8.9521  | 15.4285 | 25.3313 | 49.9326  | 93.9762  | 136.0140 | 115.1970 | 0.0000 |
| 2.75  | 0.0000                       | -0.9995 | 1.9763  | 6.7893  | 13.9778 | 27.4108  | 47.5586  | 63.3244  | 49.9824  | 0.0000 |
| 3.00  | 0.0000                       | -1.9394 | -0.7851 | 2.6164  | 7.7082  | 15.0692  | 23.5141  | 27.9572  | 20.3211  | 0.0000 |
| 3.15  | 0.0000                       | -2.0533 | -1.4725 | 1.2883  | 5.4347  | 10.5898  | 15.1965  | 16.3007  | 10.9269  | 0.0000 |
| 3.25  | 0.0000                       | -2.0351 | -1.7055 | 0.7061  | 4.3334  | 8.4120   | 11.2806  | 10.9849  | 6.7387   | 0.0000 |
| 3.40  | 0.0000                       | -1.9284 | -1.8428 | 0.1421  | 3.1293  | 6.0193   | 7.1269   | 5.5420   | 2.5506   | 0.0000 |
| 3.50  | 0.0000                       | -1.8274 | -1.8426 | -0.0885 | 2.5490  | 4.8592   | 5.1979   | 3.1259   | 0.7468   | 0.0000 |
| 3.60  | 0.0000                       | -1.7150 | -1.7967 | -0.2388 | 2.0998  | 3.9570   | 3.7574   | 1.4011   | -0.5013  | 0.0000 |
| 3.75  | 0.0000                       | -1.5398 | -1.6777 | -0.3611 | 1.6070  | 2.9622   | 2.2625   | -0.2616  | -1.6388  | 0.0000 |
| 3.85  | 0.0000                       | -1.4252 | -1.5808 | -0.3967 | 1.3666  | 2.4750   | 1.5854   | -0.9361  | -2.0567  | 0.0000 |
| 4.00  | 0.0000                       | -1.2628 | -1.4270 | -0.4082 | 1.0980  | 1.9298   | 0.8958   | -1.5189  | -2.3532  | 0.0000 |
| 4.10  | 0.0000                       | -1.1628 | -1.3248 | -0.3983 | 0.9636  | 1.6572   | 0.5897   | -1.7124  | -2.4041  | 0.0000 |
| 4.25  | 0.0000                       | -1.0259 | -1.1782 | -0.3691 | 0.8090  | 1.3447   | 0.2846   | -1.8185  | -2.3478  | 0.0000 |
| 4.35  | 0.0000                       | -0.9434 | -1.0868 | -0.3445 | 0.7292  | 1.1842   | 0.1529   | -1.8100  | -2.2563  | 0.0000 |
| 4.50  | 0.0000                       | -0.8319 | -0.9607 | -0.3048 | 0.6342  | 0.9950   | 0.0262   | -1.7285  | -2.0778  | 0.0000 |
| 5.00  | 0.0000                       | -0.5524 | -0.6350 | -0.1842 | 0.4390  | 0.6220   | -0.0992  | -1.2703  | -1.4366  | 0.0000 |
| 6.00  | 0.0000                       | -0.2647 | -0.2951 | -0.0588 | 0.2471  | 0.3071   | -0.0671  | -0.6045  | -0.6532  | 0.0000 |
| 7.00  | 0.0000                       | -0.1433 | -0.1562 | -0.0218 | 0.1436  | 0.1636   | -0.0463  | -0.3219  | -0.3353  | 0.0000 |
| 10.00 | 0.0000                       | -0.0339 | -0.0348 | 0.0003  | 0.0384  | 0.0359   | -0.0189  | -0.0796  | -0.0767  | 0.0000 |
| 15.00 | 0.0000                       | -0.0061 | -0.0055 | 0.0018  | 0.0086  | 0.0064   | -0.0056  | -0.0169  | -0.0153  | 0.0000 |
| 20.00 | 0.0000                       | -0.0017 | -0.0013 | 0.0011  | 0.0030  | 0.0018   | -0.0023  | -0.0058  | -0.0051  | 0.0000 |

TABLE VI: CO–Ne static interaction induced dipole polarizability evaluated with the CCSD method and the d-aug-cc-pVTZ-33211 basis set.  $R$  values in Å,  $\theta$  in  $^\circ$ , and polarizability values in au. See the text for details.

| R [Å] | $\Delta\alpha(R, \theta) \times 10^3$ |           |           |           |           |           |           |           |           |           |
|-------|---------------------------------------|-----------|-----------|-----------|-----------|-----------|-----------|-----------|-----------|-----------|
|       | $\theta [^\circ]$                     |           |           |           |           |           |           |           |           |           |
|       | 0.0                                   | 20.0      | 40.0      | 60.0      | 80.0      | 100.0     | 120.0     | 140.0     | 160.0     | 180.0     |
| 2.20  | -115.4613                             | -98.3988  | -147.0608 | -260.9449 | -341.4797 | -327.7186 | -161.7697 | 335.0151  | 1501.5630 | 2515.3060 |
| 2.30  | -145.9609                             | -132.5362 | -160.4494 | -240.1714 | -301.3699 | -299.0246 | -201.2248 | 88.3362   | 689.1333  | 1129.3098 |
| 2.50  | -128.5488                             | -121.5218 | -135.3135 | -181.8640 | -221.9057 | -231.9219 | -215.4974 | -163.8601 | -71.8917  | -23.2417  |
| 2.75  | -65.5073                              | -64.8912  | -78.8583  | -112.1496 | -140.6216 | -153.2192 | -172.5509 | -227.9482 | -316.5348 | -370.2214 |
| 3.00  | -11.6671                              | -15.4014  | -32.9328  | -62.2806  | -84.8397  | -93.8324  | -114.4937 | -183.8708 | -294.2215 | -355.4088 |
| 3.15  | 10.1085                               | 4.7815    | -14.1943  | -42.0646  | -62.0173  | -68.1440  | -83.6366  | -144.3420 | -243.2479 | -297.3384 |
| 3.25  | 20.4391                               | 14.4171   | -5.0613   | -31.9308  | -50.3384  | -54.6478  | -66.0662  | -118.5230 | -206.3623 | -254.3504 |
| 3.40  | 30.7007                               | 24.0852   | 4.4947    | -20.7326  | -37.0320  | -38.9716  | -44.4822  | -83.8162  | -153.8404 | -192.3972 |
| 3.50  | 34.7433                               | 27.9699   | 8.6594    | -15.3808  | -30.3982  | -31.0473  | -33.1000  | -64.1701  | -122.7933 | -155.4235 |
| 3.60  | 37.0733                               | 30.2863   | 11.4708   | -11.3320  | -25.1615  | -24.7584  | -23.8695  | -47.4826  | -95.6493  | -122.8709 |
| 3.75  | 38.2040                               | 31.5920   | 13.8010   | -7.1090   | -19.3290  | -17.7618  | -13.4644  | -27.7170  | -62.4110  | -82.6599  |
| 3.85  | 37.8463                               | 31.4396   | 14.4496   | -5.2093   | -16.4677  | -14.3655  | -8.4236   | -17.6781  | -44.9333  | -61.3106  |
| 4.00  | 36.2555                               | 30.2352   | 14.5301   | -3.3166   | -13.2891  | -10.6776  | -3.0758   | -6.5434   | -24.8218  | -36.4786  |
| 4.10  | 34.7574                               | 29.0237   | 14.1902   | -2.5108   | -11.7225  | -8.9276   | -0.6652   | -1.2701   | -14.8637  | -24.0201  |
| 4.25  | 32.1816                               | 26.8929   | 13.3399   | -1.7563   | -9.9565   | -7.0599   | 1.6787    | 4.1517    | -4.0507   | -10.2744  |
| 4.35  | 30.3786                               | 25.3848   | 12.6485   | -1.4591   | -9.0626   | -6.1837   | 2.6109    | 6.4809    | 0.9670    | -3.7585   |
| 4.50  | 27.6976                               | 23.1298   | 11.5437   | -1.2043   | -8.0151   | -5.2485   | 3.3575    | 8.5792    | 6.0320    | 3.0085    |
| 5.00  | 20.0310                               | 16.6584   | 8.1913    | -1.0069   | -5.8719   | -3.7702   | 3.1627    | 9.2606    | 10.9815   | 10.6755   |
| 6.00  | 11.0773                               | 9.1448    | 4.3349    | -0.8526   | -3.6335   | -2.5976   | 1.2527    | 5.2381    | 7.4007    | 7.9210    |
| 7.00  | 6.6883                                | 5.4939    | 2.5261    | -0.6713   | -2.4175   | -1.8795   | 0.3823    | 2.8701    | 4.4081    | 4.8588    |
| 10.00 | 2.1252                                | 1.7328    | 0.7570    | -0.2982   | -0.8965   | -0.7710   | -0.0665   | 0.7937    | 1.4176    | 1.6341    |
| 15.00 | 0.6051                                | 0.4936    | 0.2161    | -0.0866   | -0.2647   | -0.2400   | -0.0424   | 0.2198    | 0.4282    | 0.5057    |
| 20.00 | 0.2504                                | 0.2045    | 0.0902    | -0.0353   | -0.1108   | -0.1029   | -0.0214   | 0.0912    | 0.1836    | 0.2188    |

TABLE VII: CO–Ne interaction Cauchy moments evaluated with the CCSD method and the d-aug-cc-pVTZ-33211 basis set.  $R$  values in Å,  $\theta$  in  $^\circ$ , and polarizability values in au. See the text for details.

| R [Å] | $\Delta S(-4)_{ave}(R, \theta) \times 10^2$ |          |          |          |           |           |           |           |           |           |
|-------|---------------------------------------------|----------|----------|----------|-----------|-----------|-----------|-----------|-----------|-----------|
|       | $\theta [^\circ]$                           |          |          |          |           |           |           |           |           |           |
|       | 0.0                                         | 20.0     | 40.0     | 60.0     | 80.0      | 100.0     | 120.0     | 140.0     | 160.0     | 180.0     |
| 2.20  | 169.5300                                    | 130.9434 | 34.6874  | -58.3727 | -122.3038 | -125.3054 | 66.3545   | 910.5359  | 3641.0731 | 6709.6567 |
| 2.30  | 91.3709                                     | 61.8702  | -7.1688  | -75.0179 | -124.0725 | -136.0503 | -20.7663  | 510.3739  | 1976.9556 | 3310.4195 |
| 2.50  | 19.6256                                     | 1.2738   | -39.9232 | -80.6894 | -111.5788 | -131.3212 | -108.1808 | 72.2072   | 509.1612  | 817.8278  |
| 2.75  | -2.5778                                     | -13.9650 | -39.8852 | -65.6203 | -84.3496  | -102.5450 | -124.8680 | -121.8402 | -66.0034  | -26.7323  |
| 3.00  | 0.0054                                      | -8.0954  | -27.0417 | -45.8153 | -57.6643  | -69.5831  | -99.6809  | -150.8589 | -200.5026 | -222.5346 |
| 3.15  | 4.4218                                      | -2.5541  | -19.0609 | -35.3066 | -44.3836  | -52.2766  | -79.3052  | -137.1824 | -204.8735 | -237.0573 |
| 3.25  | 7.3184                                      | 0.9009   | -14.3585 | -29.2759 | -36.8828  | -42.3163  | -65.9913  | -123.0114 | -193.9842 | -228.3066 |
| 3.40  | 10.9782                                     | 5.2236   | -8.5046  | -21.7601 | -27.5936  | -29.8529  | -47.8682  | -99.3444  | -167.9953 | -201.8068 |
| 3.50  | 12.8236                                     | 7.4367   | -5.4154  | -17.7120 | -22.5953  | -23.1203  | -37.4161  | -83.7743  | -148.1475 | -180.2087 |
| 3.60  | 14.1777                                     | 9.1212   | -2.9297  | -14.3520 | -18.4369  | -17.5321  | -28.3858  | -69.2330  | -128.2430 | -157.9663 |
| 3.75  | 15.3689                                     | 10.7616  | -0.1858  | -10.4200 | -13.5434  | -11.0231  | -17.4361  | -50.1414  | -100.3537 | -126.0937 |
| 3.85  | 15.6882                                     | 11.3581  | 1.0956   | -8.4153  | -11.0288  | -7.7434   | -11.7269  | -39.4300  | -83.8252  | -106.8622 |
| 4.00  | 15.6182                                     | 11.6773  | 2.3769   | -6.1401  | -8.1469   | -4.1018   | -5.2170   | -26.3451  | -62.6342  | -81.8231  |
| 4.10  | 15.2966                                     | 11.5993  | 2.8987   | -5.0122  | -6.7011   | -2.3613   | -2.0350   | -19.4521  | -50.9125  | -67.7621  |
| 4.25  | 14.5375                                     | 11.1828  | 3.3201   | -3.7608  | -5.0749   | -0.5356   | 1.3539    | -11.4787  | -36.6626  | -50.4121  |
| 4.35  | 13.9118                                     | 10.7706  | 3.4255   | -3.1518  | -4.2706   | 0.2785    | 2.8776    | -7.4976   | -29.1364  | -41.1011  |
| 4.50  | 12.8807                                     | 10.0374  | 3.4081   | -2.4829  | -3.3720   | 1.0621    | 4.3366    | -3.1238   | -20.3297  | -30.0218  |
| 5.00  | 9.4663                                      | 7.4276   | 2.7070   | -1.4142  | -1.8864   | 1.6495    | 5.2112    | 2.8598    | -5.3944   | -10.3006  |
| 6.00  | 4.9836                                      | 3.8866   | 1.3662   | -0.8057  | -1.0389   | 0.8028    | 2.8362    | 2.5141    | -0.1864   | -1.8593   |
| 7.00  | 2.8057                                      | 2.1684   | 0.7065   | -0.5492  | -0.7023   | 0.2780    | 1.3428    | 1.2101    | -0.0671   | -0.8504   |
| 10.00 | 0.7560                                      | 0.5756   | 0.1610   | -0.1963  | -0.2562   | -0.0265   | 0.2253    | 0.2179    | -0.0224   | -0.1698   |
| 15.00 | 0.1838                                      | 0.1404   | 0.0405   | -0.0472  | -0.0677   | -0.0223   | 0.0341    | 0.0471    | 0.0187    | -0.0010   |
| 20.00 | 0.0689                                      | 0.0530   | 0.0162   | -0.0064  | -0.0263   | -0.0118   | 0.0073    | 0.0180    | 0.0143    | 0.0104    |
